# Supplementary material
Source: PubMed Central journal article supplement (PMC2906585)
Supplement: 0913472107_pnas.200913472SI.pdf [file 0913472107_pnas.200913472SI.pdf]

# Supporting Information

Raz-Prag et al. 10.1073/pnas.0913472107

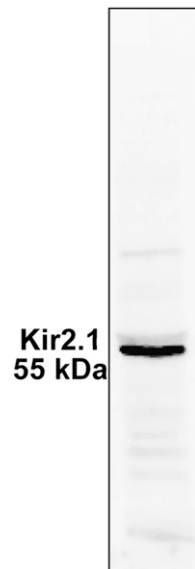

**Fig. S1.** Specificity of Kir2.1-Ab on Western blot of rat retina whole-cell lysate. Electrophoresis on 10% SDS-polyacrylamide gel probed with Kir2.1-Ab. The Kir2.1-Ab recognized a major band of 55 kDa in rat retinal cell extracts, consistent with the expected molecular mass of the monomeric form of Kir2.1.

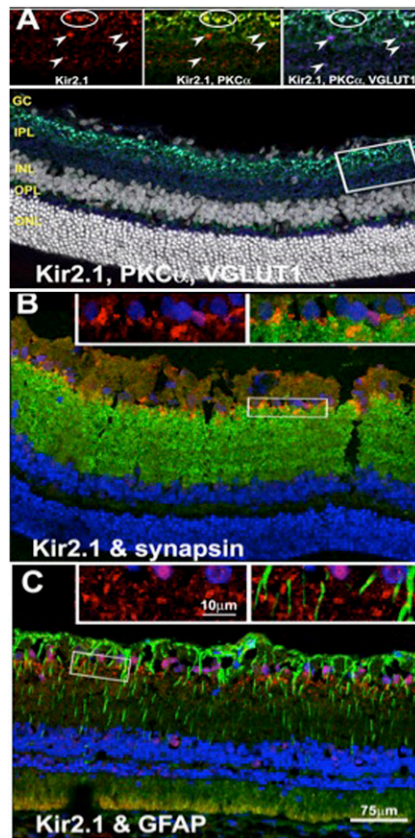

**Fig. S2.** Conventional postmortem labeling of Kir2.1 with bipolar, amacrine, and Müller cell markers. (A) Triple labeling with Kir2.1-Ab (red), PKC $\alpha$ -Ab (green), and VGLUT1-Ab (blue) in a congenic nondystrophic RCS rat shows that Kir2.1 is expressed on rod bipolar cell termini (colocalization of red, green, and blue; circles) and on cone bipolar cell termini (colocalization of red and blue; arrows). Kir2.1 colocalized with VGLUT1 but not PKC $\alpha$  indicates expression on cone BCs. Cell nuclei are in gray. (B) Double labeling with Kir2.1-Ab (red) and synapsin I/II-Ab (green) in a congenic nondystrophic RCS rat shows that Kir2.1 does not localize to amacrine cells. Cell nuclei are in blue. (C) Double labeling with Kir2.1-Ab (red) and GFAP-Ab (green) in a 10-wk-old dystrophic RCS rat shows that Kir2.1 does not localize to Müller cells. Cell nuclei are in blue. *Insets* show higher magnification of areas indicated with rectangle.

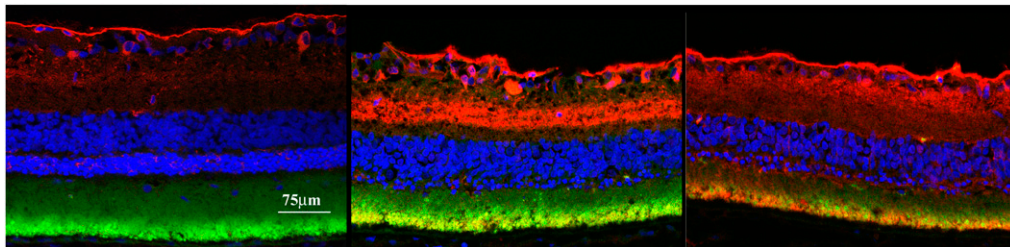

**Fig. S3.** IHC in control eyes injected with IgG:carrier demonstrates a range of nonspecific labeling. Examples from three eyes treated in vivo with rabbit IgG:carrier complex (red) show a range of labeling, usually including the internal limiting membrane, ganglion cell layer, and structures in IPL. Labeling throughout the retina was less common (*Right*). Photoreceptor outer segment debris is autofluorescent (green).
